# Supplementary material
Source: MDPI journal article supplement (https://www.mdpi.com/2071-1050/14/15/9419)
Supplement: s1 [file s1]

# Supplementary material

## Dynamics of fire foci in the Amazon Rainforest and their consequences on environmental degradation

Helvécio de Oliveira Filho<sup>1</sup>, José Francisco de Oliveira-Júnior<sup>1,2</sup>, Marcos Vinícius da Silva<sup>3</sup>, Alexandre Maniçoba da Rosa Ferraz Jardim<sup>3</sup>, Munawar Shah<sup>4</sup>, João Paulo Assis Gobo<sup>5</sup>, Claudio José Cavalcante Blanco<sup>6</sup>, Luiz Claudio Gomes Pimentel<sup>7</sup>, Corbiniano da Silva<sup>11</sup>, Elania Barros da Silva<sup>1</sup>, Thelma de Barros Machado<sup>1</sup>, Carlos Rodrigues Pereira<sup>1</sup>, Ninu Krishnan M. V.<sup>8,9</sup>, Vijith Hamza<sup>10</sup>, Mohd Anul Haq<sup>11</sup>, Ilyas Khan<sup>12</sup>, Abdullah Mohamed<sup>13</sup> and El-Awady Attia<sup>14,15</sup>

**Table S1.** Eigenvalue, percentage of variance and loadings for the first three principal components of the PCA.

|                             | Eigenvalue | Variance (%) | Cumulative (%) |
|-----------------------------|------------|--------------|----------------|
| Principal component 1 (PC1) | 2.29       | 25.47        | 25.47          |
| Principal component 2 (PC2) | 2.18       | 24.27        | 49.74          |
| Principal component 3 (PC3) | 1.20       | 13.36        | 63.10          |
| <i>Loading in PCA</i>       |            |              |                |
| Variable                    | PC1        | PC2          | PC3            |
| Fire foci                   | 0.50       | 0.40         | -0.55          |
| PRODES                      | 0.59       | 0.68         | 0.28           |
| Forest                      | 0.43       | 0.64         | 0.55           |
| Mining                      | 0.24       | 0.48         | -0.59          |
| Pasture                     | -0.55      | 0.34         | 0.18           |
| Urban                       | 0.52       | -0.06        | 0.20           |
| Livestock                   | -0.52      | 0.22         | 0.26           |
| Agriculture                 | -0.60      | 0.49         | -0.15          |
| Crops                       | -0.49      | 0.73         | -0.11          |
